# Supplementary material for: Applying the cost of generating force hypothesis to uphill running
Source: PeerJ. 2014 Jul 15;2:e482. doi: 10.7717/peerj.482 (PMC4106190; doi:10.7717/peerj.482)
Supplement: Supplemental Information 1 [file peerj-02-482-s001.xlsx]

## Sheet: Sheet1
	Velocity	Angle	Grade	Participant
	(m/s)	(degrees)	(%)	I	II	III	IV	V	VI	VII	VIII
Braking Impulse (10-3)	2	0	0	-58.8	nr	-48.8	nr	-72.3	-60.6	nr	-79
	2.5	0	0	-45.4	-57.5	-46.4	-71.8	-65.8	-53.3	-53.2	-73
	3	0	0	-43.2	-55.7	-48.8	-62.4	-66.6	-48.7	-49.8	-65.2
	2	9	15.6	-2.2	nr	-1.5	nr	-4.8	-0.8	-0.1	-0.8
	2.5	9	15.6	-2.6	-4	-2.6	-3.8	-9.2	-2.7	-0.2	-2.1
	3	9	15.6	-1.7	-5.2	-1.9	-5.5	-6.1	-2.7	-0.025	-4.7
Total Propelling Impulse (10-3)	2	0	0	58.8	nr	49.6	nr	72.5	60.1	nr	80.5
	2.5	0	0	45.9	56.9	47.2	71.9	65.8	52.9	53.4	73.6
	3	0	0	43.6	55.8	49.2	62.8	66	49.1	49.8	66
	2	9	15.6	0	nr	0.8	nr	3.4	0.95	0	0
	2.5	9	15.6	0	2.9	0.3	3.1	7.4	1.1	0	1.4
	3	9	15.6	0	4.3	0	4.8	4.4	2.2	0	2.4
I_GRFwasted (10-3)	2	0	0	117.6	nr	98.4	nr	144.8	120.7	nr	159.5
	2.5	0	0	91.3	114.5	93.6	143.7	131.6	106.2	106.6	146.6
	3	0	0	86.9	111.5	98	125.2	132.6	97.8	99.6	131.2
	2	9	15.6	2.2	nr	2.3	nr	8.2	1.8	0.06	0.77
	2.5	9	15.6	2.6	7	3	6.8	16.5	3.8	0.16	3.5
	3	9	15.6	1.7	9.5	1.9	10.2	10.5	4.9	0.025	7.1
Step freqency (steps/minute)	2	0	0	2.69978	2.88892	2.82725	2.47494	2.65111	2.67487	2.79994	2.44708
	2.5	0	0	2.79603	2.87977	2.93815	2.50063	2.70746	2.91758	3.04878	2.46396
	3	0	0	2.79877	2.9304	2.96296	2.61404	2.73149	2.97133	3.14416	2.54615
	2	9	15.6	2.79838	2.87233	2.79642	2.50376	2.57632	2.84414	2.95116	2.42336
	2.5	9	15.6	2.88767	2.9347	2.89981	2.60417	2.72331	2.97089	3.05623	2.61472
	3	9	15.6	2.96912	3.02252	3.00165	2.74499	2.83326	3.03905	3.20307	2.69651
Contact times (s)	2	0	0	0.281286	0.324095	0.301476	0.342381	0.27	0.278095	0.335333	0.322905
	2.5	0	0	0.23619	0.275714	0.270429	0.35019	0.249714	0.265476	0.267905	0.296905
	3	0	0	0.218381	0.246143	0.270333	0.29	0.229667	0.241143	0.231571	0.277143
	2	9	15.6	0.279762	0.330286	0.309	0.380762	0.333524	0.303333	0.292238	0.326905
	2.5	9	15.6	0.243524	0.276048	0.265381	0.335667	0.293524	0.253952	0.258571	0.304667
	3	9	15.6	0.22481	0.25	0.237286	0.299095	0.258667	0.23081	0.221286	0.272
