# Supplementary material for: Applying the cost of generating force hypothesis to uphill running
Source: PeerJ. 2014 Jul 15;2:e482. doi: 10.7717/peerj.482 (PMC4106190; doi:10.7717/peerj.482)
Supplement: Supplemental Information 2 [file peerj-02-482-s002.xlsx]

## Sheet: Sheet1
Day	Velocity	Angle	Grade	V̇O2
	(m/s)	(degrees)	(%)	(ml/(kg·min))
				1	2	3	4	5	6	7	8
1	Standing	-	-	4.17344	4.75195	3.59772	5.07997	4.24554	4.45972	3.99431	4.44734
	2	0	0	23.6956	24.8037	25.0557	26.6137	22.8123	26.3023	23.1794	23.249
		1	1.7	26.1279	25.4282	25.7859	27.6619	24.5688	27.9842	25.0781	26.2526
		2	3.5	28.1078	29.4241	29.4883	31.0743	27.1537	30.1572	27.8225	29.4273
		3	5.2	31.7346	33.3493	31.5695	33.4525	28.5589	32.7984	29.5354	32.1796
		4	7	33.9288	35.1457	34.5999	35.4343	32.4693	35.6451	33.1327	34.0666
		6	10.5	40.431	39.2501	40.1658	43.6558	39.1972	41.5616	38.1025	41.7841
		8	14.1	47.0998	46.8773	46.2784	50.555	44.1529	48.3324	44.8537	48.8006
2	Standing	-	-	4.63953	4.9802	4.86381	4.3197	5.23384	4.91257	4.4866	4.10311
	2.5	0	0	30.4241	28.5288	30.9637	27.763	29.2133	29.6763	28.395	27.0961
		1	1.7	32.9133	31.1901	33.9107	30.2778	31.9547	32.1157	30.4475	29.9409
		2	3.5	37.0655	35.888	36.8351	34.0893	35.2439	36.4276	33.6285	33.8742
		3	5.2	39.6904	38.8911	40.2749	37.6846	37.7387	38.1803	36.4525	37.5903
		4	7	43.5923	41.9033	42.9168	42.2664	41.4932	43.1829	40.898	41.3805
	3	0	0	37.1861	33.6576	37.3689	34.3417	35.2891	36.6224	34.4614	33.4168
		1	1.7	40.0726	39.4002	42.6638	38.1806	38.19	39.4175	37.468	36.1415
		2	3.5	44.1155	43.1285	45.7836	42.5757	43.019	43.8891	43.2175	39.4422
		3	5.2	48.3533	47.5832	48.8828	46.2668	46.4108	48.5129	46.797	43.6787
		4	7	53.2586	50.855	53.9245	51.7666	50.8561	52.9612	51.9497	46.9698
Day	Velocity	Angle	Grade	Metabolic rate
	(m/s)	(degrees)	(%)	(W/kg)
				1	2	3	4	5	6	7	8
1	Standing	-	-	1.42906	1.59442	1.23556	1.71098	1.46155	1.50635	1.38199	1.51729
	2	0	0	8.05377	8.33042	8.44472	8.92508	7.73465	8.84002	7.85899	7.94746
		1	1.7	8.86507	8.6946	8.82363	9.43274	8.38027	9.41716	8.57607	8.97637
		2	3.5	9.61908	9.97645	10.0763	10.4404	9.22091	10.265	9.43117	10.0012
		3	5.2	10.8709	11.3129	10.7243	11.3312	9.84541	11.146	10.1226	10.9836
		4	7	11.5834	11.9886	11.7843	12.0506	11.1542	12.1986	11.3079	11.7484
		6	10.5	13.8905	13.5511	13.7703	14.8896	13.4299	14.2778	13.1681	14.297
		8	14.1	16.3243	16.3145	16.0218	17.3731	15.337	16.854	15.573	16.8667
2	Standing	-	-	1.54002	1.67249	1.64409	1.46919	1.74337	1.64991	1.53117	1.41835
	2.5	0	0	10.1552	9.644	10.6179	9.44556	9.88126	9.9895	9.64402	9.25042
		1	1.7	11.0636	10.616	11.5787	10.3275	10.8349	10.8532	10.4136	10.2396
		2	3.5	12.4331	12.1618	12.644	11.6932	11.9362	12.2924	11.4733	11.6299
		3	5.2	13.3889	13.2859	13.7781	12.9716	12.8283	12.9872	12.5375	12.8717
		4	7	14.7272	14.3191	14.8337	14.4741	14.1558	14.7477	14.0846	14.237
	3	0	0	12.4068	11.4049	12.6882	11.6234	11.9324	12.2421	11.7246	11.2445
		1	1.7	13.3817	13.2061	14.4341	12.9288	13.0111	13.1907	12.8097	12.359
		2	3.5	14.7827	14.5513	15.7203	14.5637	14.7066	14.9082	14.7348	13.5083
		3	5.2	16.2161	16.1844	16.8192	15.8312	15.9266	16.5455	16.0828	15.034
		4	7	18.0678	17.4977	18.6595	17.7918	17.6096	18.3625	17.9667	16.3651
